# Supplementary material for: Asynchrony induces polarization in attraction-based models of collective motion
Source: PubMed Central journal article supplement (PMC6502356; doi:10.1098/rsos.190381), 2019-04-24
Supplement: rsos190381_review_history.pdf [file rsos190381_review_history.pdf]

## **Asynchrony induces polarization in attraction-based models of collective motion**

Daniel Strömbom, Tasnia Hassan, W. Hunter Greis and Alice Antia

### **Article citation details**

*R. Soc. open sci.* **6**: 190381.

<http://dx.doi.org/10.1098/rsos.190381>

### **Review timeline**

Original submission: 4 March 2019

Final acceptance: 15 March 2019

Note: Reports are unedited and appear as submitted by the referee. The review history appears in chronological order.

Note: This manuscript was transferred from another Royal Society journal with peer review.

## Review History

### Decision letter (RSOS-190381.R0)

15-Mar-2019

Dear Mr Strömbom:

It is a pleasure to accept your manuscript entitled "Asynchrony induces polarisation in attraction based models of collective motion" in its current form for publication in Royal Society Open Science. The editor is satisfied with how you have addressed the previous reviewers' comments and has recommended that the manuscript can be accepted without further peer review.

Thank you for your fine contribution. On behalf of the Editors of Royal Society Open Science, we look forward to your continued contributions to the Journal.

Kind regards,

Royal Society Open Science Editorial Office

Royal Society Open Science

[openscience@royalsociety.org](mailto:openscience@royalsociety.org)

on behalf of Professor Andreas Kyprianou (Associate Editor) and Professor Kevin Padian (Subject Editor).

Follow Royal Society Publishing on Twitter: @RSocPublishing

Follow Royal Society Publishing on Facebook:

<https://www.facebook.com/RoyalSocietyPublishing.FanPage/>

Read Royal Society Publishing's blog: <https://blogs.royalsociety.org/publishing/>
